# Supplementary material for: Association of myopia and astigmatism with postoperative ocular high order aberration after small incision lenticule extraction
Source: Springer Nature journal article supplement (doi:10.1186/s12886-024-03475-w), 2024-05-13
Supplement: MOESM1 [file 27084664]

**Supplementary Table 1** Summary of studies involving HOA after SMILE and related parameters

| Study            | Year | Country | Eyes(n) | Mean age       | Mean Sphere(D)    | Mean Cylinder(D) | Preop CCT( $\mu$ m) | Preop CDVA(log MAR) | Follow-up (mo) | Aberration analyzer | Position  | Surgery-related parameters(Model; Energy; Cap Thickness/Diameter; Lenticule Diameter; Incision Length/Location; Other technologies) |                 |                 |                                          |                 |
|------------------|------|---------|---------|----------------|-------------------|------------------|---------------------|---------------------|----------------|---------------------|-----------|-------------------------------------------------------------------------------------------------------------------------------------|-----------------|-----------------|------------------------------------------|-----------------|
|                  |      |         |         |                |                   |                  |                     |                     |                |                     |           | Postop tHOA                                                                                                                         | Postop SA       | Postop CA       | Postop TA                                |                 |
| Xiaojing Li [1]  | 2015 | China   | 55      | 22.2 $\pm$ 3.0 | -5.74 $\pm$ 1.39  | -0.66 $\pm$ 0.70 | /                   | 0.00                | 6              | Pentacam HR         | Cornea    | 500-kHz Visumax system; 110-120nJ; 110 $\mu$ m/7mm; 6.0mm; 2.0-5.0mm/90 $^\circ$ ; -                                                | 0.95 $\pm$ 0.23 | 0.41 $\pm$ 0.18 | V -0.61 $\pm$ 0.39<br>H -0.24 $\pm$ 0.19 | /               |
| Minjie Ye [2]    | 2016 | China   | 170     | 25.3 $\pm$ 4.2 | -5.03 $\pm$ 1.89* | /                | /                   | /                   | 6              | Pentacam HR         | Cornea    | 500-kHz Visumax system; 130nJ; 120-130 $\mu$ m/-; 6.0mm; 4.0-5.0mm/90 $^\circ$ ; -                                                  | 0.22 $\pm$ 0.06 | 0.38 $\pm$ 0.14 | V -0.27 $\pm$ 0.22<br>H 0.09 $\pm$ 0.22  | /               |
| Wenjing Wu [3]   | 2016 | China   | 73      | 24.5 $\pm$ 6.3 | -5.44 $\pm$ 1.30  | -0.71 $\pm$ 0.67 | 551.5 $\pm$ 24.6    | /                   | 3              | Pentacam HR         | Cornea    | 500-kHz Visumax system; 110 $\mu$ m/-; 6.0-6.5mm; 2.0-5.0mm/90 $^\circ$ ; -                                                         | 0.82 $\pm$ 0.24 | 0.48 $\pm$ 0.17 | 0.54 $\pm$ 0.25                          | 0.10 $\pm$ 0.06 |
| Xiaoqin Chen [4] | 2017 | China   | 39      | 22.0 $\pm$ 4.0 | -4.41 $\pm$ 1.23  | -2.26 $\pm$ 0.73 | /                   | 0.01 $\pm$ 0.03     | 3              | WaveScan            | Whole eye | 500-kHz Visumax system; 170nJ; 110 $\mu$ m/-; 6.0-6.5mm; 2.0-5.0mm/90 $^\circ$ ; -                                                  | 0.27 $\pm$ 0.07 | 0.09 $\pm$ 0.05 | /                                        | /               |
| Liuyang Li [5]   | 2017 | China   | 19      | 24.6 $\pm$ 4.7 | -2.24 $\pm$ 0.67  | -0.66 $\pm$ 0.60 | 550.8 $\pm$ 33.0    | /                   | 3              | WaveScan            | Whole eye | 500-kHz Visumax system; 155nJ; 110-120 $\mu$ m/7.5-7.6mm; 6.5mm; 3.00-3.13mm/90 $^\circ$ ; -                                        | 0.40 $\pm$ 0.03 | 0.10 $\pm$ 0.03 | V -0.08 $\pm$ 0.05<br>H -0.05 $\pm$ 0.03 | /               |
|                  | 2017 | China   | 20      | 22.3 $\pm$ 5.2 | -4.26 $\pm$ 0.57  | -0.46 $\pm$ 0.41 | 548.6 $\pm$ 22.2    | /                   | 3              | WaveScan            | Whole eye | 500-kHz Visumax system; 155nJ; 110-120 $\mu$ m/7.5-7.6mm; 6.5mm; 3.00-3.13mm/90 $^\circ$ ; -                                        | 0.46 $\pm$ 0.02 | 0.22 $\pm$ 0.03 | V -0.18 $\pm$ 0.03<br>H -0.19 $\pm$ 0.03 | /               |
|                  | 2017 | China   | 21      | 24.1 $\pm$ 4.9 | -7.02 $\pm$ 0.67  | -0.67 $\pm$ 0.64 | 552.9 $\pm$ 28.2    | /                   | 3              | WaveScan            | Whole eye | 500-kHz Visumax system; 155nJ; 110-120 $\mu$ m/7.5-7.6mm; 6.5mm; 3.00-3.13mm/90 $^\circ$ ; -                                        | 0.54 $\pm$ 0.03 | 0.22 $\pm$ 0.02 | V -0.24 $\pm$ 0.04<br>H -0.22 $\pm$ 0.04 | /               |

|                          |      |             |     |          |             |            |            |            |   |                |           |                                                                                                 |           |            |                              |           |
|--------------------------|------|-------------|-----|----------|-------------|------------|------------|------------|---|----------------|-----------|-------------------------------------------------------------------------------------------------|-----------|------------|------------------------------|-----------|
| Hun Lee [6]              | 2018 | South Korea | 81  | 28.3±6.0 | -4.66±1.25  | -1.03±0.75 | 548.9±20.7 | /          | 6 | Pentacam HR    | Cornea    | 500-kHz Visumax system; 100-115nJ; 120-140µm/-; 6.2-7.0mm; 2.0mm/-; Triple Centration Technique | 0.61±0.18 | 0.37±0.13  | 0.35±0.19                    | /         |
| Ikhyun Jun [7]           | 2018 | South Korea | 45  | 24.8±4.6 | -3.19±1.55  | -2.90±0.42 | 560.5±29.2 | -0.05±0.07 | 6 | Keratron Scout | Cornea    | 500-kHz Visumax system; -/-; -/-; Triple Centration Technique                                   | 0.56±0.14 | 0.24±0.13  | 0.31±0.15                    | 0.22±0.13 |
| HongYing Jin [8]         | 2018 | China       | 65  | 24.5±7.3 | -6.94±1.00  | -0.76±0.68 | 552.6±25.6 | /          | 3 | Pentacam HR    | Cornea    | 500-kHz Visumax system; 155nJ; 120µm/7.5-7.6mm; -; 2.0mm/120°; -                                | 0.99±0.28 | 0.42±0.14  | V -0.68±0.31<br>H -0.04±0.40 | /         |
|                          | 2018 | China       | 132 | 23.8±5.9 | -4.13±1.00  | -0.64±0.50 | 541.5±28.0 | /          | 3 | Pentacam HR    | Cornea    | 500-kHz Visumax system; 155nJ; 120µm/7.5-7.6mm; -; 2.0mm/120°; -                                | 0.66±0.20 | 0.26±0.13  | V -0.36±0.27<br>H -0.06±0.27 | /         |
| David Sung Yong Kang [9] | 2018 | South Korea | 55  | 28.6±6.4 | -4.41±1.74  | -0.90±0.66 | 553.3±26.1 | 0.01±0.01  | 3 | Keratron Scout | Cornea    | 500-kHz Visumax system; -/-; -/-; -                                                             | 0.57±0.18 | 0.34±0.14  | 0.35±0.18                    | /         |
|                          | 2018 | South Korea | 55  | 27.5±6.2 | -3.79±1.52  | -1.09±0.97 | 552.6±31.5 | 0.01±0.01  | 3 | Keratron Scout | Cornea    | 500-kHz Visumax system; -/-; -/-; Triple Centration Technique                                   | 0.55±0.14 | 0.30±0.13  | 0.31±0.16                    | /         |
| Manrong Yu [10]          | 2019 | China       | 32  | 24.2±4.5 | -4.10±0.90* | /          | 553.0±27.2 | /          | 3 | WASCA          | Cornea    | 500-kHz Visumax system; 130nJ; 120µm/7.5mm; 6.5mm; 2.0mm/90°; -                                 | 0.39±0.13 | -0.26±0.28 | 0.73±0.48                    | 0.33±0.20 |
| Meiyan Li [11]           | 2019 | China       | 68  | 29.5±5.8 | -5.95±1.37  | -0.84±0.78 | 551.8±30.0 | -0.07±0.11 | 3 | Pentacam HR    | Cornea    | 500-kHz Visumax system; 130nJ; 100µm/-; 6.5-6.8mm; 2.0-4.5mm/90°; -                             | 0.81±0.25 | 0.42±0.12  | 0.59±0.28                    | /         |
| Weiming Yang [12]        | 2019 | China       | 29  | 26.5±7.5 | -8.23±0.56  | -0.94±0.71 | 542.9±17.4 | -0.01±0.06 | 6 | WASCA          | Whole eye | 500-kHz Visumax system; 130nJ; 110µm/7.5mm; 6.0-6.5mm; 2.0-2.5mm; -                             | 0.55±0.10 | 0.28±1.00  | 0.42±0.14                    | 0.12±0.07 |

|                      |      |             |     |          |              |            |            |            |    |             |           |                                                                             |           |           |                            |           |
|----------------------|------|-------------|-----|----------|--------------|------------|------------|------------|----|-------------|-----------|-----------------------------------------------------------------------------|-----------|-----------|----------------------------|-----------|
| Bing Qin [13]        | 2019 | China       | 30  | 24.5±6.8 | -6.40±1.29*  | -0.79±0.60 | 540.5±30.1 | 0.02±0.05  | 6  | WASCA       | Cornea    | 500-kHz Visumax system; 130nJ; 110-120µm/-; 6.0-6.6mm; 2.0mm/90°; -         | 0.36±0.11 | 0.09±0.07 | 0.26±0.13                  | 0.13±0.07 |
|                      | 2019 | China       | 30  | 26.9±6.1 | -10.06±0.77* | -1.24±1.05 | 547.2±25.1 | 0.00±0.05  | 6  | WASCA       | Cornea    | 500-kHz Visumax system; 130nJ; 110-120µm/-; 6.0-6.6mm; 2.0mm/90°; -         | 0.41±0.13 | 0.20±0.12 | 0.25±0.14                  | 0.11±0.07 |
| Jay Jiyong Kwak [14] | 2020 | South Korea | 57  | 25.6±5.5 | -4.37±1.98   | -1.14±0.82 | /          | -0.04±0.04 | 3  | iTrace      | Cornea    | 500-kHz Visumax system; -; -/-; -; -/-; Triple Centration Technique         | 0.46±0.22 | 0.21±0.14 | 0.28±0.17                  | 0.17±0.12 |
| Mehmet Gulmez [15]   | 2020 | Turkey      | 94  | 28.0±6.4 | -4.89±2.31   | -1.64±1.45 | 535.6±27.7 | 0.02±0.04  | 6  | WaveLight   | Cornea    | 500-kHz Visumax system; 150nJ; 130µm/-; 6.0-6.5mm, 2.0mm/135°; -            | 0.28±0.11 | 0.24±0.05 | 0.17±0.03                  | 0.14±0.02 |
| Yuanyuan Zhong [16]  | 2020 | China       | 43  | 24.6±3.9 | -5.12±1.77   | -2.47±0.54 | /          | -0.03±0.04 | 48 | Pentacam HR | Cornea    | 500-kHz Visumax system; 130nJ; 120µm/7.6mm; 6.0-6.9mm; 2.0mm/90°; -         | 0.84±0.29 | 0.30±0.17 | 0.61±0.30                  | /         |
|                      | 2020 | China       | 31  | 25.3±4.2 | -5.58±1.78   | -0.55±0.28 | /          | -0.04±0.04 | 48 | Pentacam HR | Cornea    | 500-kHz Visumax system; 130nJ; 120µm/7.6µm; 6.0-6.9mm; 2.0mm/90°; -         | 0.86±0.28 | 0.40±0.18 | 0.63±0.32                  | /         |
| Fei Xia [17]         | 2020 | China       | 26  | 28.3±7.8 | -5.95±1.14   | -0.76±0.48 | 544.1±28.2 | /          | 1  | Pentacam HR | Cornea    | 500-kHz Visumax system; 130nJ; 100-110µm/7.5-7.8mm; 6.5-6.8mm; 4.5mm/90°; - | 0.49±0.25 | 0.14±0.09 | V 0.05±0.07<br>H 0.07±0.09 | /         |
| Ruoyan Wei [18]      | 2020 | China       | 103 | 28.7±5.0 | -7.39±0.79   | -0.93±0.69 | 549.4±29.1 | -0.03±0.04 | 6  | WASCA       | Whole eye | 500-kHz Visumax system; 130nJ; 110-120µm/-; 6.2-6.5mm; 2.0mm/90°; -         | 0.37±0.11 | 0.14±0.09 | 0.25±0.13                  | 0.12±0.07 |
| Ikhyun Jun [19]      | 2021 | South Korea | 91  | 27.8±6.0 | -3.18±1.28   | -0.93±0.69 | 565.2±24.4 | -0.12±0.06 | 6  | WaveLight   | Cornea    | 500-kHz Visumax system; -; -/-; -; -/-; Triple Centration Technique         | 0.48±0.13 | 0.26±0.10 | 0.26±0.14                  | 0.17±0.09 |

|                      |      |               |     |                    |             |            |            |            |    |             |           |                                                                                 |           |           |                             |           |
|----------------------|------|---------------|-----|--------------------|-------------|------------|------------|------------|----|-------------|-----------|---------------------------------------------------------------------------------|-----------|-----------|-----------------------------|-----------|
| Ikhyun Jun           | 2021 | South Korea   | 59  | 27.3±7.0           | -3.26±1.49  | -0.97±0.94 | 563.9±22.0 | -0.11±0.07 | 6  | WaveLight   | Cornea    | 500-kHz Visumax system; -/-; -/;; Triple Centration Technique                   | 0.53±0.16 | 0.34±0.13 | 0.29±0.17                   | 0.15±0.09 |
| D. Rex Hamilton [20] | 2021 | United States | 49  | 31.6±6.3           | -3.77±1.60  | -0.50±0.46 | /          | /          | 1  | Galilei G4  | Cornea    | 500-kHz Visumax system; 125-130nJ(4.5 spot spacing); 120µm/7.5µm; 6.5mm; -/-; - | 0.58±0.15 | 0.32±0.12 | 0.37±0.14                   | /         |
|                      | 2021 | United States | 49  | 29.1±5.1           | -4.02±1.39  | -0.10±0.19 | /          | /          | 1  | Galilei G4  | Cornea    | 500-kHz Visumax system; 125nJ(3.0 spot spacing); 120µm/7.5µm; 6.5mm; -/-; -     | 0.63±0.13 | 0.40±0.10 | 0.39±0.15                   | /         |
| Yewei Yin [21]       | 2021 | China         | 51  | 23.9±4.8           | -7.96±0.94* | -0.79±0.51 | /          | /          | 6  | iTrace      | Whole eye | 500-kHz Visumax system; 130nJ; 100-120µm/-; 6.0-6.8mm; 4.0mm/90°; -             | 0.59±0.60 | 0.26±0.45 | 0.40±0.41                   | 0.16±0.12 |
| Meng Lin [22]        | 2021 | China         | 64  | 23.3±5.0           | -4.17±1.55  | -0.66±0.54 | 555.8±31.7 | -0.02±0.04 | 6  | OPD-Scan II | Whole eye | 500-kHz Visumax system; 135nJ; 120µm/7-8mm; 6.4-6.9mm; 2.0mm/90°; -             | 0.53±0.26 | 0.14±0.10 | 0.29±0.17                   | 0.29±0.11 |
| Yu Zhang [23]        | 2022 | China         | 102 | 28.2±6.1           | -5.09±1.26  | -0.63±0.31 | 548.0±24.0 | /          | 6  | WaveLight   | Cornea    | 500-kHz Visumax system; 140nJ; 120µm/7.6µm; 6.5mm; 2.0mm/-; -                   | 0.70±0.20 | 0.45±0.16 | 0.40±0.20                   | /         |
| Mengjun Fu [24]      | 2022 | China         | 36  | 29.4±5.9           | -2.58±0.59  | 0.73±0.44  | /          | /          | 24 | WASCA       | Whole eye | 500-kHz Visumax system; 130nJ; 120µm/-; 6.5-6.8mm; 2.0mm/90°; -                 | 0.82±0.53 | 0.12±0.10 | V -0.10±0.18<br>H 0.08±0.25 | /         |
| Cong Zhou [25]       | 2023 | China         | 100 | 21.00 <sup>#</sup> | -3.78±0.10  | -3.61±0.10 | 541.1±3.5  | 0.00±0.00  | 3  | Sirius      | Cornea    | 500-kHz Visumax system; 130nJ; 110-120µm/-; 6.5mm; -/-; -                       | 0.68±0.02 | 0.37±0.01 | 0.44±0.02                   | 0.21±0.01 |
|                      | 2023 | China         | 100 | 18.00 <sup>#</sup> | -0.64±0.06  | -0.58±0.06 | 546.9±3.5  | 0.00±0.00  | 3  | Sirius      | Cornea    | 500-kHz Visumax system; 130nJ; 110-120µm/-; 6.8mm; -/-; -                       | 0.61±0.02 | 0.31±0.01 | 0.37±0.02                   | 0.20±0.01 |

|                  |      |       |     |          |            |            |            |            |    |        |           |                                                                          |           |            |           |           |
|------------------|------|-------|-----|----------|------------|------------|------------|------------|----|--------|-----------|--------------------------------------------------------------------------|-----------|------------|-----------|-----------|
| Wuqiang Luo [26] | 2023 | China | 32  | 27.7±5.6 | -7.84±0.64 | -1.00±0.45 | 546.1±23.3 | /          | 48 | WASCA  | Whole eye | 500-kHz Visumax system; 130nJ; 110-120μm/-; 6.0-6.7mm; -/-; -            | 0.20±0.08 | -3.87±2.43 | 2.88±2.14 | /         |
| This study       | 2024 | China | 65  | 28.6±4.9 | -3.35±0.62 | -0.76±0.60 | 537.5±29.7 | -0.04±0.04 | 3  | iTrace | Whole eye | 500-kHz Visumax system; 110-120nJ; 110-120μm/7.6mm; 6.5mm; 3.0mm/120°; - | 0.18±0.08 | 0.02±0.06  | 0.11±0.08 | 0.09±0.04 |
|                  | 2024 | China | 85  | 29.0±6.2 | -5.53±0.99 | -0.89±0.71 | 535.4±26.4 | -0.03±0.04 | 3  | iTrace | Whole eye | 500-kHz Visumax system; 110-120nJ; 110-120μm/7.6mm; 6.5mm; 3.0mm/120°; - | 0.19±0.77 | 0.02±0.05  | 0.14±0.08 | 0.08±0.05 |
|                  | 2024 | China | 103 | 29.3±5.7 | -4.50±1.24 | -0.47±0.35 | 532.9±25.0 | -0.04±0.04 | 3  | iTrace | Whole eye | 500-kHz Visumax system; 110-120nJ; 110-120μm/7.6mm; 6.5mm; 3.0mm/120°; - | 0.17±0.07 | 0.03±0.06  | 0.12±0.07 | 0.08±0.04 |
|                  | 2024 | China | 47  | 27.6±5.6 | -4.78±1.64 | -1.62±0.49 | 539.9±32.2 | -0.03±0.04 | 3  | iTrace | Whole eye | 500-kHz Visumax system; 110-120nJ; 110-120μm/7.6mm; 6.5mm; 3.0mm/120°; - | 0.21±0.09 | 0.02±0.06  | 0.15±0.09 | 0.10±0.06 |

\* Spherical equivalent; # Median of values; CA = coma aberration; CCT = central corneal thickness; CDVA = corrected distance visual acuity; H = horizontal coma aberration; HOA = high order aberration; Postop = Postoperative; SA = spherical aberration; TA = trefoil aberration; tHOA = total high order aberration; V = vertical coma aberration. CDVA was statistically analyzed in the form of LogMAR. All values are displayed in the form of mean ± standard deviation.

## References

- [1] Li X, Wang Y, Dou R. Aberration compensation between anterior and posterior corneal surfaces after Small incision lenticule extraction and Femtosecond laser-assisted laser in-situ keratomileusis. *Ophthalmic Physiol Opt.* 2015;35(5):540-51.
- [2] Ye MJ, Liu CY, Liao RF, Gu ZY, Zhao BY, Liao Y. SMILE and Wavefront-Guided LASIK Out-Compete Other Refractive Surgeries in Ameliorating the Induction of High-Order Aberrations in Anterior Corneal Surface. *J Ophthalmol.* 2016;2016:8702162.
- [3] Wu W, Wang Y. Corneal Higher-Order Aberrations of the Anterior Surface, Posterior Surface, and Total Cornea After SMILE, FS-LASIK, and FLEx Surgeries. *Eye Contact Lens.* 2016;42(6):358-65.
- [4] Chen X, Wang Y, Zhang J, Yang SN, Li X, Zhang L. Comparison of ocular higher-order aberrations after SMILE and Wavefront-guided Femtosecond LASIK for myopia. *BMC Ophthalmol.* 2017;17(1):42.
- [5] Li L, Cheng GPM, Ng ALK, Chan TCY, Jhanji V, Wang Y. Influence of Refractive Status on the Higher-Order Aberration Pattern After Small Incision Lenticule Extraction Surgery. *Cornea.* 2017;36(8):967-72.
- [6] Lee H, Yong Kang DS, Reinstein DZ, Arba-Mosquera S, Kim EK, Seo KY, Kim TI. Comparing corneal higher-order aberrations in corneal wavefront-guided transepithelial photorefractive keratectomy versus small-incision lenticule extraction. *J Cataract Refract Surg.* 2018;44(6):725-33.
- [7] Jun I, Kang DSY, Reinstein DZ, Arba-Mosquera S, Archer TJ, Seo KY, Kim TI. Clinical Outcomes of SMILE With a Triple Centration Technique and Corneal Wavefront-Guided Transepithelial PRK in High Astigmatism. *J Refract Surg.* 2018;34(3):156-63.
- [8] Jin HY, Wan T, Yu XN, Wu F, Yao K. Corneal higher-order aberrations of the anterior surface, posterior surface, and total cornea after small incision lenticule extraction (SMILE): high myopia versus mild to moderate myopia. *BMC Ophthalmol.* 2018;18(1):295.

- [9] Kang DSY, Lee H, Reinstein DZ, Roberts CJ, Arba-Mosquera S, Archer TJ, Kim EK, Seo KY, Kim TI. Comparison of the Distribution of Lenticule Decentration Following SMILE by Subjective Patient Fixation or Triple Marking Centration. *J Refract Surg.* 2018;34(7):446-52.
- [10] Yu M, Chen M, Liu W, Dai J. Comparative study of wave-front aberration and corneal Asphericity after SMILE and LASEK for myopia: a short and long term study. *BMC Ophthalmol.* 2019;19(1):80.
- [11] Li M, Li M, Chen Y, Miao H, Yang D, Ni K, Zhou X. Five-year results of small incision lenticule extraction (SMILE) and femtosecond laser LASIK (FS-LASIK) for myopia. *Acta Ophthalmol.* 2019;97(3):e373-80.
- [12] Yang W, Liu S, Li M, Shen Y, Zhou X. Visual Outcomes after Small Incision Lenticule Extraction and Femtosecond Laser-Assisted LASIK for High Myopia. *Ophthalmic Res.* 2020;63(4):427-33.
- [13] Qin B, Zhao J, Li M, Yao P, Zhou X. The comparison of visual outcomes, aberrations, and Bowman's layer micro-distortions after femtosecond laser small-incision lenticule extraction (SMILE) for the correction of high and moderate myopia and myopic astigmatism. *BMC Ophthalmol.* 2019;19(1):138.
- [14] Kwak JJ, Jun I, Kim EK, Seo KY, Kim TI. Clinical Outcomes of Small Incision Lenticule Extraction in Myopia: Study of Vector Parameters and Corneal Aberrations. *Korean J Ophthalmol.* 2020;34(1):76-84.
- [15] Gulmez M, Tekce A, Kamis U. Comparison of refractive outcomes and high-order aberrations after small incision lenticule extraction and wavefront-guided femtosecond-assisted laser in situ keratomileusis for correcting high myopia and myopic astigmatism. *Int Ophthalmol.* 2020;40(12):3481-9.
- [16] Zhong Y, Li M, Han T, Fu D, Zhou X. Four-year outcomes of small incision lenticule extraction (SMILE) to correct high myopic astigmatism. *Br J Ophthalmol.* 2021;105(1):27-31.
- [17] Xia F, Shen Y, Han T, Zhao J, Xu H, Zhou X. Small Incision Lenticule Extraction (SMILE) for Moderate and High Myopia: Seven-Year Outcomes of Refraction, Corneal Tomography, and Wavefront Aberrations. *J Ophthalmol.* 2020;2020:3825864.
- [18] Wei R, Li M, Zhang H, Aruma A, Miao H, Wang X, Zhou J, Zhou X. Comparison of objective and subjective visual quality early after implantable collamer lens V4c (ICL V4c) and small incision lenticule extraction (SMILE) for high myopia correction. *Acta Ophthalmol.* 2020;98(8):e943-50.
- [19] Jun I, Kang DSY, Roberts CJ, Lee H, Jean SK, Kim EK, Seo KY, Kim TI. Comparison of Clinical and Biomechanical Outcomes of Small Incision Lenticule Extraction With 120- and 140- $\mu$ m Cap Thickness. *Transl Vis Sci Technol.* 2021;10(8):15.
- [20] Hamilton DR, Chen AC, Khorrami R, Nutkiewicz M, Nejad M. Comparison of early visual outcomes after low-energy SMILE, high-energy SMILE, and LASIK for myopia and myopic astigmatism in the United States. *J Cataract Refract Surg.* 2021;47(1):18-26.
- [21] Yin Y, Lu Y, Xiang A, Fu Y, Zhao Y, Li Y, Hu T, Du K, Hu S, Fu Q, Wu X, Wen D. Comparison of the optical quality after SMILE and FS-LASIK for high myopia by OQAS and iTrace analyzer: a one-year retrospective study. *BMC Ophthalmol.* 2021;21(1):292.
- [22] Lin M, Zhou H, Hu Z, Huang J, Lu F, Hu L. Comparison of small incision lenticule extraction and transepithelial photorefractive keratectomy in terms of visual quality in myopia patients. *Acta Ophthalmol.* 2021;99(8):e1289-96.
- [23] Zhang Y, Sun X, Chen Y. Comparison of Corneal Optical Quality After SMILE, Wavefront-Optimized LASIK and Topography-Guided LASIK for Myopia and Myopic Astigmatism. *Front Med (Lausanne).* 2022;9:870330.
- [24] Fu M, Li M, Xian Y, Yu Z, Zhang H, Choi J, Niu L, Wang X, Zhou X. Two-Year Visual Outcomes of Evolution Implantable Collamer Lens and Small Incision Lenticule Extraction for the Correction of Low Myopia. *Front Med (Lausanne).* 2022;9:780000.
- [25] Zhou C, Li Y, Wang Y, Fan Q, Dai L. Comparison of visual quality after SMILE correction of low-to-moderate myopia in different optical zones. *Int Ophthalmol.* 2023;43(10):3623-32.
- [26] Luo W, Aruma A, Li M, Wang J, Xie J, Xiao X, Shen Y, Niu L, Wang X, Zhou X. Four-year visual outcomes and optical quality of SMILE and implantable collamer lens V4c (EVO-ICL) implantation for high myopia: a retrospective study. *BMC Ophthalmol.* 2023;23(1):341.
